# Supplementary material for: Scalable synthesis of silicon nanosheets from sand as an anode for Li-ion batteries
Source: Royal Society of Chemistry journal article supplement (doi:10.1039/c3nr05354g), 2014-01-01
Supplement: c3nr05354g1.pdf [file c3nr05354g1.pdf]

## Electronic Supplementary Information

# Scalable synthesis of silicon nanosheets from sand as an anode for Li-ion batteries

Won-Sik Kim, Yoon Hwa, Jung-Hoo Shin, Myung Yang, Hun-Joon Sohn, and Seong-Hyeon Hong \*

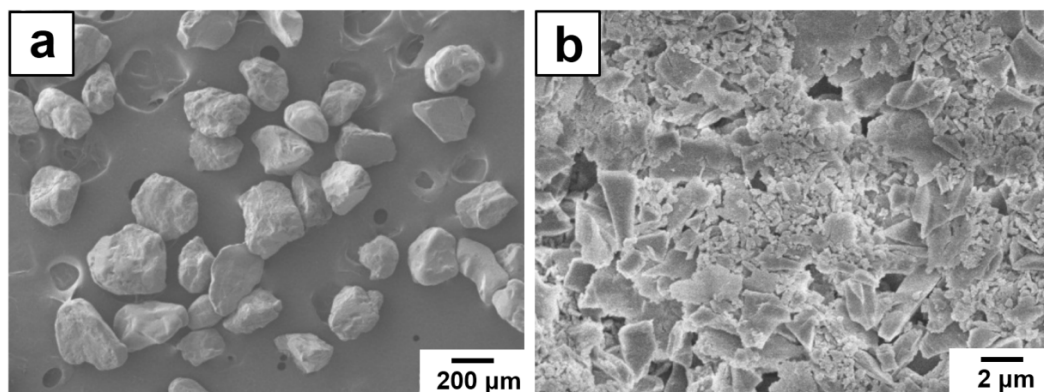

**Fig. S1** SEM images of (a) commercial and (b) milled sand.

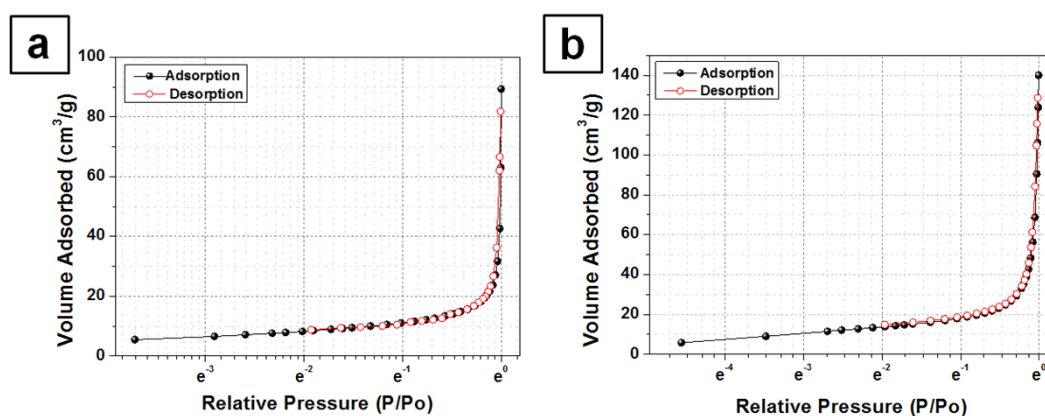

|                                      |                                      | Commercial nano-silicon | Silicon nanosheet |
|--------------------------------------|--------------------------------------|-------------------------|-------------------|
| BET Surface Area (m <sup>2</sup> /g) |                                      | 33.7426                 | 55.7588           |
| Pore (m <sup>2</sup> /g)             | BJH Adsorption Surface Area of pores | 27.4843                 | 50.8200           |
|                                      | BJH Desorption Surface Area of pores | 25.3879                 | 49.0293           |

**Fig. S2** (a) Nitrogen adsorption–desorption isotherms and (b) specific surface areas of commercial Si nanopowder and as-synthesized Si nanosheets.

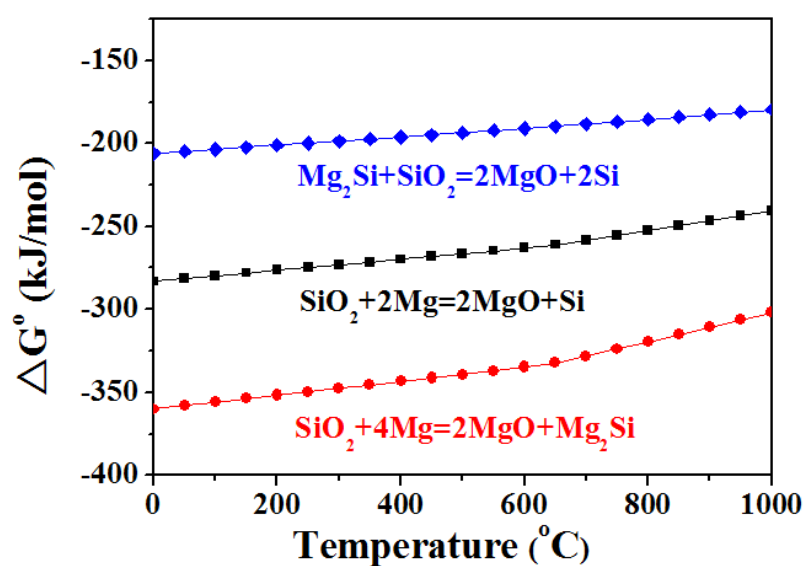

**Fig. S3** Gibbs free energy of the magnesium (Mg) and magnesium silicide ( $\text{Mg}_2\text{Si}$ ) reduction as a function of temperature.

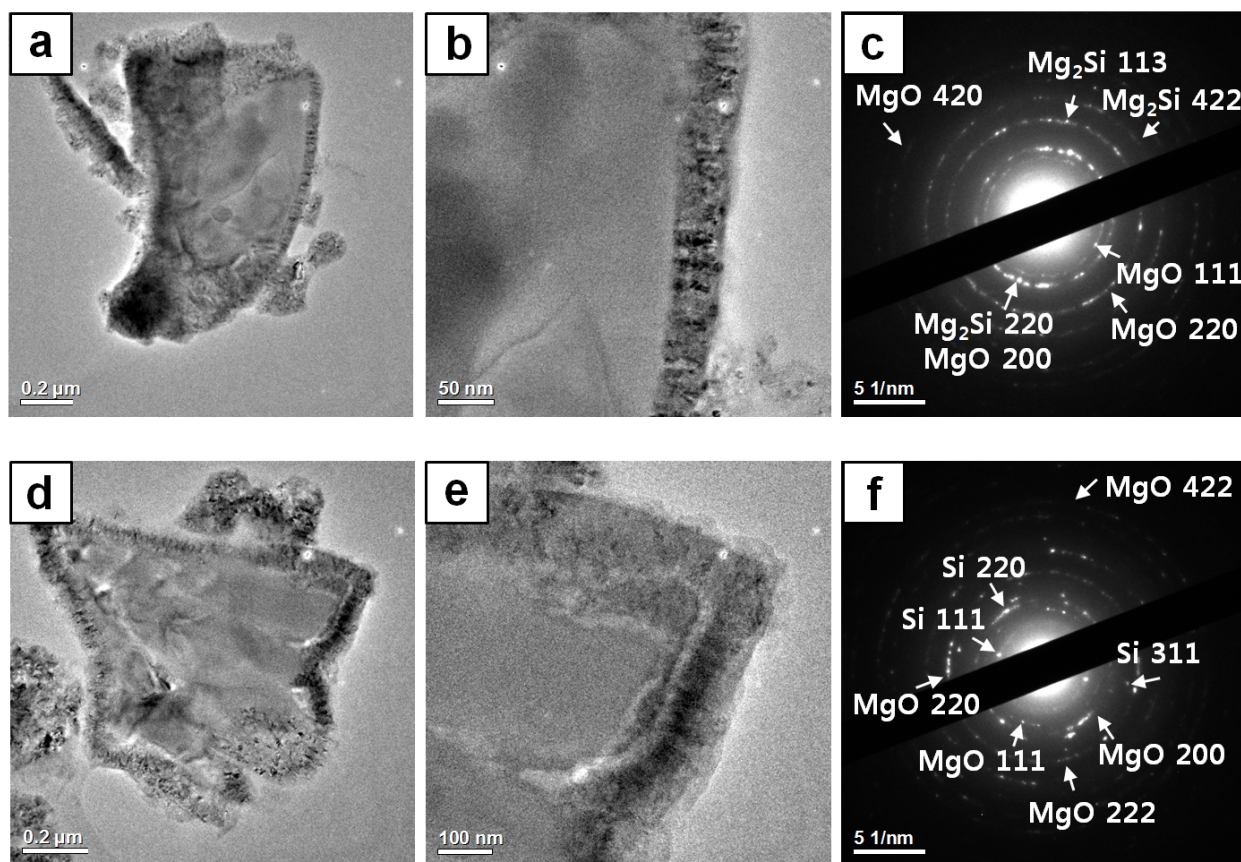

**Fig. S4** Cross-sectional TEM images and SAED patterns of as-reduced specimens which were prepared by ultra-microtome. (a,b,c) and (d,e,f) are the specimens reduced at 550 and 600 °C, respectively.

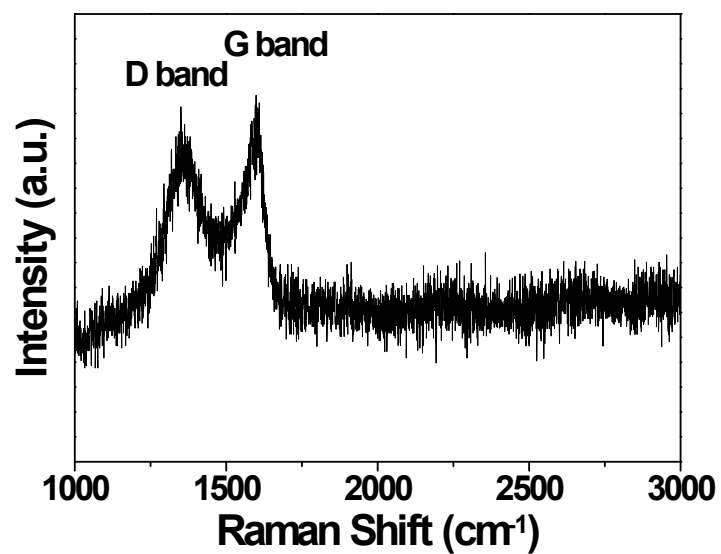

**Fig. S5** The Raman spectrum of RGO-encapsulated Si nanosheets.

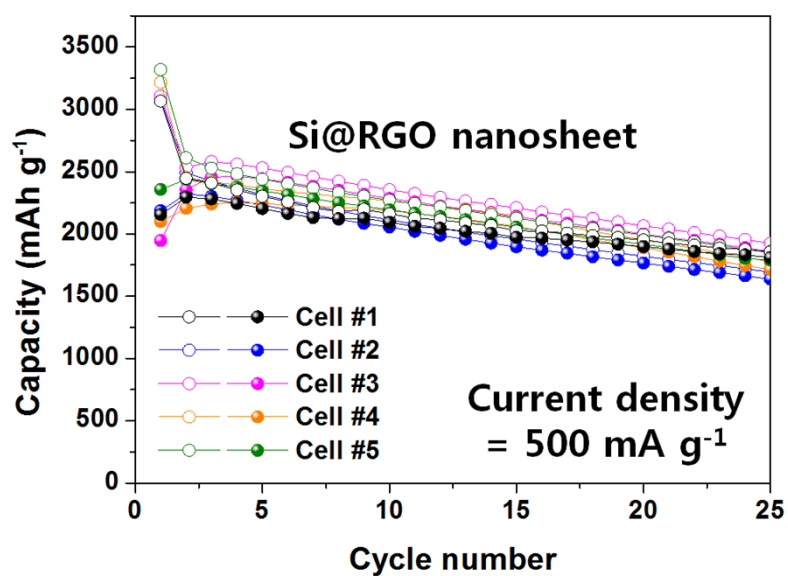

**Fig. S6** Cyclability of RGO-encapsulated Si nanosheet electrode at 500 mA g<sup>-1</sup>.
